# Supplementary material for: Momordicine-I, a Bitter Melon Bioactive Metabolite, Displays Anti-Tumor Activity in Head and Neck Cancer Involving c-Met and Downstream Signaling
Source: PubMed Central journal article supplement (PMC8003975; doi:10.3390/cancers13061432), 2021-03-21
Supplement: cancers-13-01432-s001.pdf [file cancers-13-01432-s001.pdf]

# Supplementary Materials: Momordicine-I, a Bitter Melon Bioactive Metabolite, Displays Anti-Tumor Activity in Head and Neck Cancer Involving c-Met and Downstream Signaling

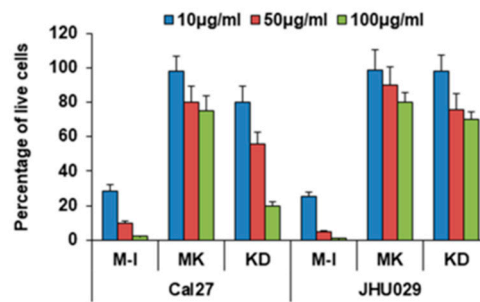

**Figure S1.** Cal27 and JHU029 cells were treated with momordicine-I (M-I), momordicosideK (MK), karavilageninD (KD) at indicated doses for 48 hr and cytotoxicity assay was performed. Small bar indicates standard error.

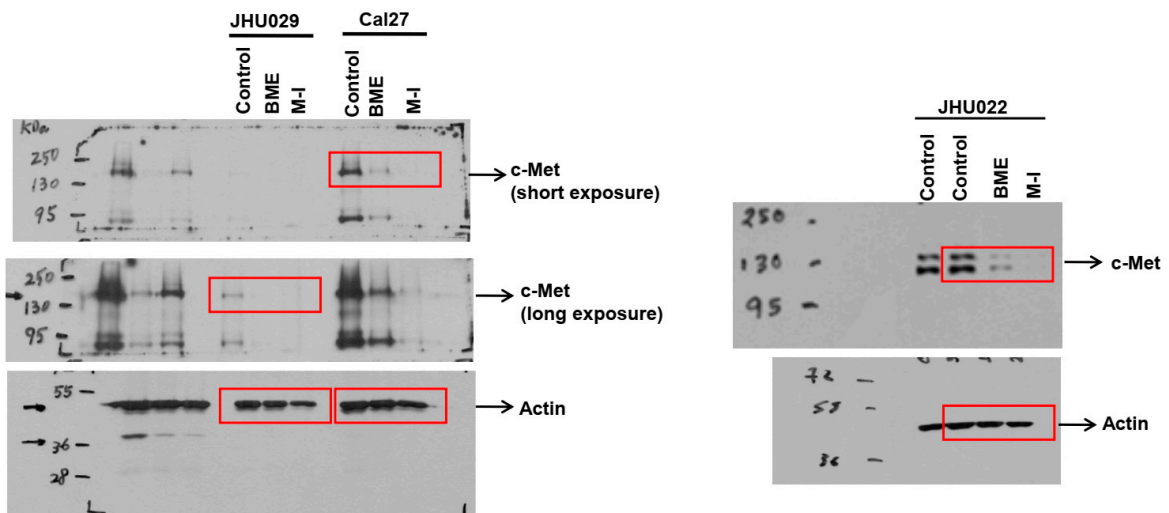

**Figure S2.** Whole blot for Figure 2A.

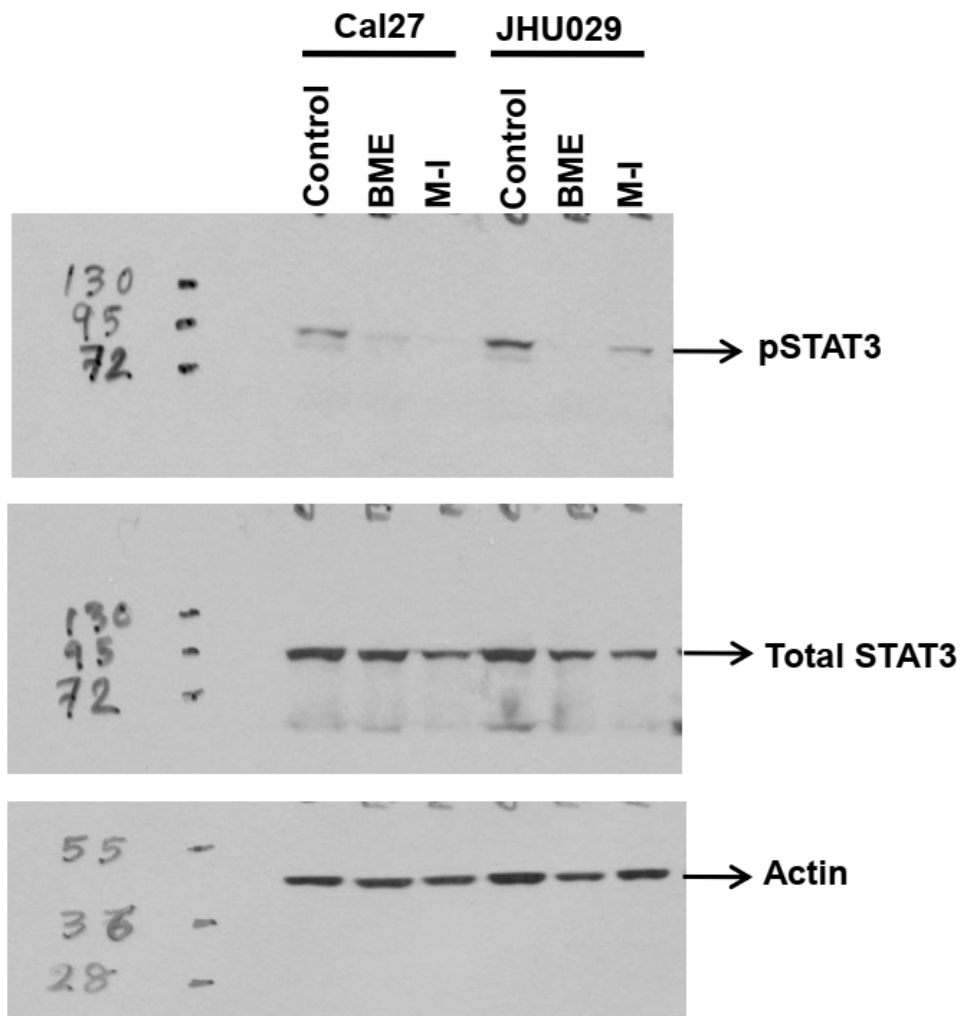

Figure S3. Whole blot for Figure 2B.

Whole blot for Figure: 2C

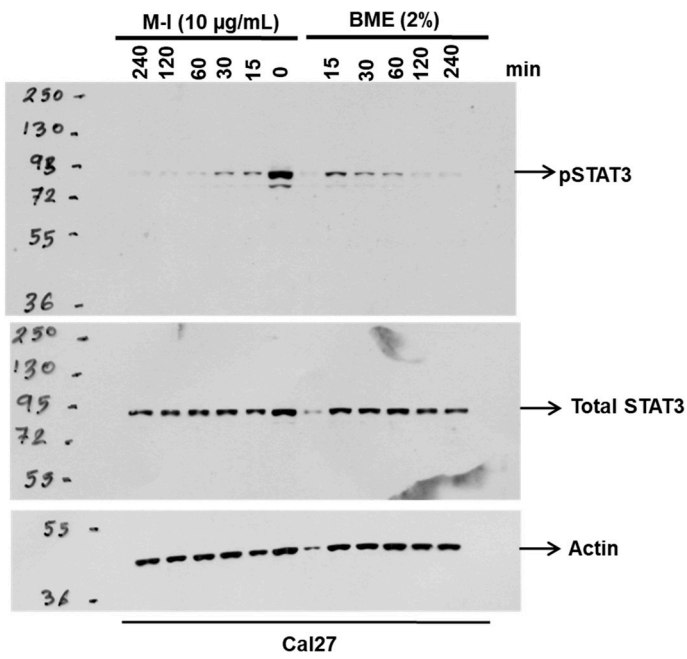

Whole blot for Figure: 2D

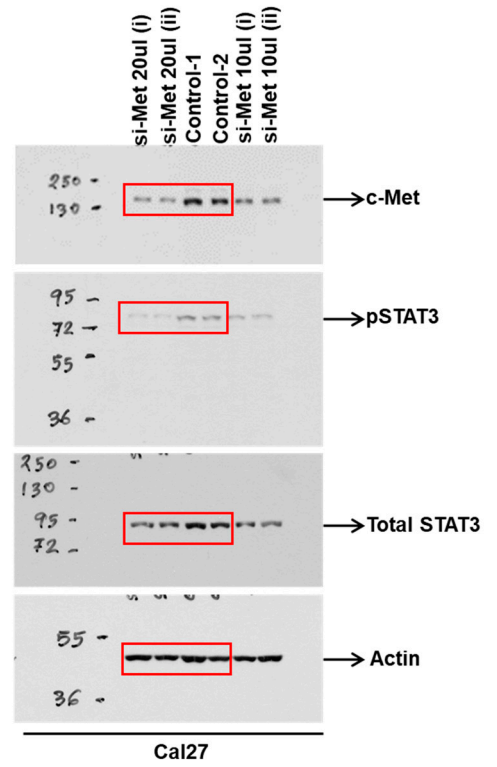

Figure S4. Whole blot for Figure 2B and 2D.

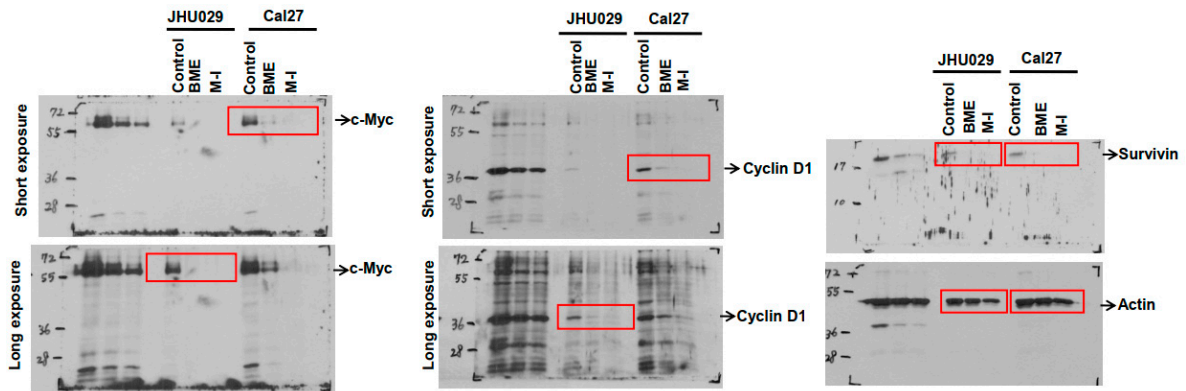

Figure S5. Whole blot for Figure 3.

Whole blot for Figure: 6D

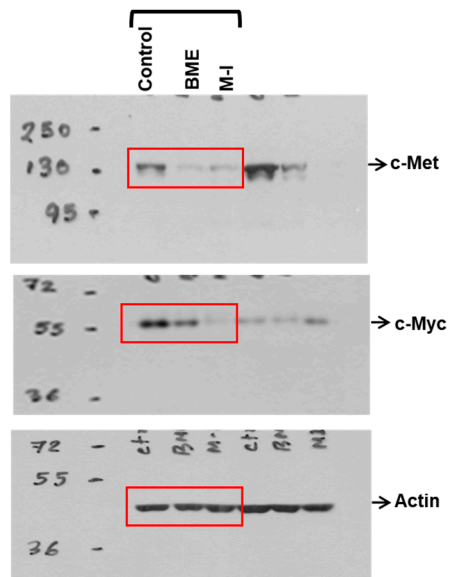

Figure S6. Whole blot for Figure 6D.

Whole blot for Figure: 7C

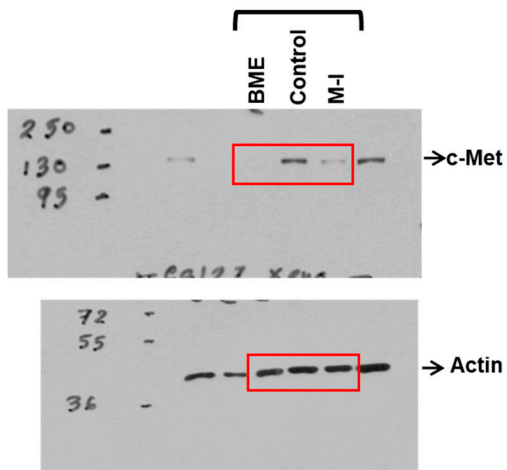

Whole blot for Figure: 7D

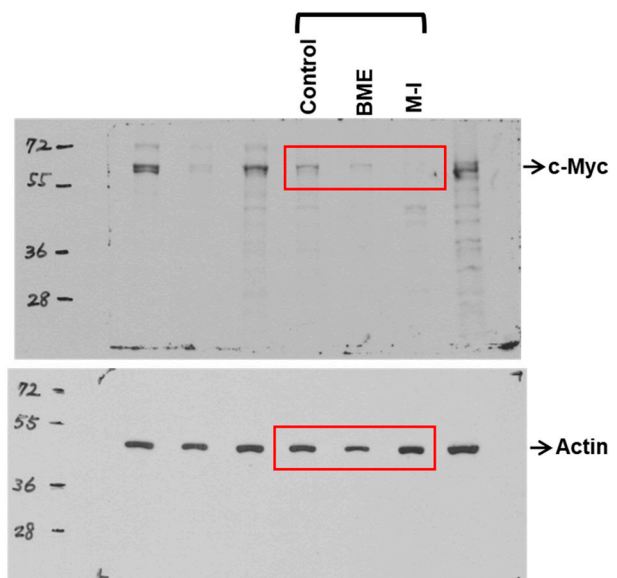

Figure S7. Whole blot for Figure 7C,D.
